# Supplementary material
Source: Springer Nature journal article supplement (https://www.springermedizin.de/resource/supplementary/12985_2008_484_MOESM4_ESM.pdf/9607852)
Supplement: MOESM4 [file 9607852]

(A)

A T A  
A T  
T T  
A A  
T C  
G C  
C G  
C G  
T A  
A T  
C G  
T G  
G C  
G C  
C G

(B)

G/GATCCAAGCGGTCATCCGTATAATATTACCGGATGGCCGC/GGCCGCAAAAGAGCT/C  
BamHI NotI SacI

AAG CGCTTTTCCT  
CGCCGCTCCT

original viral sequence  
after site-directed mutagenesis
